1 **Seeking an optimal dosing regimen for OZ439-**  
2 **DSM265 combination therapy for treating uncompli-**  
3 **cated falciparum malaria**

4 Saber Dini<sup>1,#</sup>, Sophie G Zaloumis<sup>1</sup>, David J Price<sup>1,2</sup>, Nathalie Gobeau<sup>3</sup>, Anne Kümmel<sup>4</sup>,  
5 Mohammed Cherkaoui<sup>3</sup>, Joerg J Moehrle<sup>3</sup>, James S McCarthy<sup>5</sup>, Julie A Simpson<sup>1,#</sup>

6 <sup>1</sup> Centre for Epidemiology and Biostatistics, Melbourne School of Population and  
7 Global Health, University of Melbourne

8 <sup>2</sup> Doherty Institute for Infection and Immunity, University of Melbourne and Royal  
9 Melbourne Hospital

10 <sup>3</sup> Medicines for Malaria Venture, Geneva, Switzerland

11 <sup>4</sup> IntiQuan, Basel, Switzerland

12 <sup>5</sup> QIMR Berghofer Medical Research Institute, Brisbane, QLD, Australia

13 # Address correspondence to Saber Dini, [saber.dini@unimelb.edu.au](mailto:saber.dini@unimelb.edu.au), or

14 Julie A. Simpson, [julieas@unimelb.edu.au](mailto:julieas@unimelb.edu.au).

15  
16  
17  
18  
19  
20  
21  
22  
23  
24  
25  
26  
27  
28  
29  
30  
31  
32

## Abstract

The efficacy of Artemisinin-based Combination Therapies (ACTs), the first-line treatments of uncomplicated falciparum malaria, has been declining in malaria endemic countries due to the emergence of malaria parasites resistant to these compounds. Novel alternative therapies are needed urgently to prevent the likely surge in morbidity and mortality due to failing ACTs. This study investigates the efficacy of the combination of two novel drugs, OZ439 and DSM265, using a biologically informed within-host mathematical model that accounts for the pharmacodynamic interaction between the two drugs. Model parameters were estimated using data from healthy volunteers infected with falciparum malaria collected from four trials: three that administered OZ439 and DSM265 alone, and the fourth a combination of OZ439-DSM265. Posterior predictive simulations of the model were performed to determine efficacious dosing regimens. One such regimen that predicted at least 90% of infected individuals cured 42 days after the administration of the drugs, while within the tolerable dose range, is 800 mg of OZ439 and 450 mg of DSM265. Our model can be used to inform future phase 2 and 3 clinical trials of OZ439-DSM265, fast-tracking the deployment of this combination therapy in the regions where ACTs are failing.

## 33 Introduction

34 Artemisinin-based Combination Therapies (ACTs) have been the first-line treatment of  
35 uncomplicated falciparum malaria in most malaria-endemic countries for more than two  
36 decades [1]. During this period, ACTs have played a central role in malaria control and  
37 the decline in clinical cases and malaria attributable deaths. Alarming, the efficacy of  
38 ACTs has declined below 50% in some regions [2], due to the emergence and spread of  
39 parasites resistant to the artemisinins across the Greater Mekong Region [3, 4, 5]. This  
40 worrying trend threatens to reverse the recent progress against *Plasmodium falciparum*  
41 (*P. falciparum*) achieved by widespread availability of ACTs and, of greater concern,  
42 highlights the prospect of untreatable falciparum malaria in the absence of efficacious  
43 alternative antimalarial treatments.

44 Various alternative treatments have been suggested, such as combining a failing ACT  
45 with an already available partner drug, known as Triple Artemisinin-based Combination  
46 Therapy (TACT) [6, 2], or producing novel synthetic antimalarials [7]. Key features  
47 of a successful treatment include a dosing regimen that is highly effective and easy to  
48 adhere to, so that sub-therapeutic concentrations are avoided, and combining drugs with  
49 different modes of action to prevent the development of resistance to each individual drug  
50 [8, 9].

51 OZ439 (also known as artefenomel) is a novel antimalarial drug with a mechanism  
52 of action similar to artesunate, i.e. activation of an endoperoxide bond which in turn  
53 damages various proteins of the parasite using free radicals and reactive intermediates  
54 [10]. However, unlike artesunate which has an elimination half-life of  $\sim 1$  h (500 mg

55 dose) [11], OZ439 features a significantly longer elimination half-life ( $\sim$ 260 h (500 mg  
56 dose) [12]), thus exposing the parasites to OZ439 concentrations for a long duration  
57 after a single dose. The favourable pharmacokinetic (PK) properties of OZ439 as well  
58 as its safety and tolerability at relatively high doses, and *in vitro* data suggesting that  
59 it is active against artemisinin-resistant parasites [13] make it a potential candidate to  
60 replace the artemisinins in regions where resistance to this drug has risen.

61 DSM265 is another novel synthetic antimalarial drug with a long elimination half-  
62 life (between 86 and 118 h) and satisfactory safety and tolerability [14, 15]. Similar  
63 to OZ439, the long presence of this drug in the blood plasma allows administration  
64 of a single-dose regimen, whereas current dosing regimens for ACTs recommend daily  
65 administration (and for artemether-lumefantrine twice daily) for three days. DSM265  
66 kills the parasites by inhibiting *Plasmodium* dihydroorotate dehydrogenase (DHODH)  
67 which is a vital enzyme for pyrimidine biosynthesis of the parasite [16]. None of the  
68 currently administered antimalarials has this mechanism of action, making DSM265 an  
69 attractive candidate for a new antimalarial drug.

70 The promising pharmacological characteristics of OZ439 and DSM265 described above  
71 suggest that these drugs may be suitable candidates as a combination antimalarial treat-  
72 ment. A recent trial evaluating the OZ439-DSM265 combination in healthy volunteers  
73 infected with blood-stage falciparum malaria found satisfactory safety and tolerability  
74 and promising antimalarial activity [7]. Relatively low doses were intentionally adminis-  
75 tered in the trial to allow parasitaemia recrudescence which provides important insights  
76 into the parasitological responses and is more informative for pharmacometric studies.  
77 Subsequent trials are required to investigate the efficacy of higher doses of OZ439 and

78 DSM265 in this combination treatment. A selected efficacious dosing regimen must also  
79 satisfy safety and tolerability constraints – both drugs have shown good safety and tol-  
80 erability profiles up to relatively high doses [15, 17]. In addition, the exposure profiles of  
81 drugs must overlap to a large extent to reduce the likelihood of resistance selection by  
82 the parasites due to their exposure to sub-therapeutic levels of only one drug.

83 This study focuses on the efficacy of the OZ439-DSM265 compound using a biologi-  
84 cally informed pharmacodynamic (PD) mathematical model that accounts for the stage-  
85 specific killing action of the drugs [18, 19, 20, 21]. The PD interaction between OZ439  
86 and DSM265 was determined and accommodated in the model. Data from four separate  
87 trials of healthy volunteers inoculated with blood-stage *falciparum* malaria (OZ439 and  
88 DSM265 given alone and the OZ439-DSM265 combination therapy) were analysed. A  
89 Bayesian approach was used for parameter estimation which enabled us to use the infor-  
90 mation from modelling the mono-therapy trials data as prior information for estimating  
91 the parameters of the combination therapy. Simulations of the fitted model at different  
92 OZ439-DSM265 doses were performed to propose regimens required to cure (within 42  
93 days of follow-up) at least 90% of individuals infected with uncomplicated *P. falciparum*.  
94 This work was aimed at informing the selection of dose regimens to investigate in future  
95 clinical trials of the OZ439-DSM265 combination.

## 96 Results

97 Data collected from volunteers infected with *P. falciparum* in mono-therapy trials of  
98 OZ439 and DSM265 and the OZ439-DSM265 combination therapy trial were used for

99 model fitting; Table 1. The measured drug concentrations of the volunteers were first  
100 used to estimate the population PK model parameters and between-subject variability.  
101 A sequential PK-PD modelling approach was then performed where PK profiles were  
102 simulated for each volunteer based on the post-hoc individual PK parameter estimates,  
103 which were subsequently substituted into the PD model; see the *Materials and Methods*  
104 section for further details.

## 105 **Pharmacokinetics**

106 A two-compartment PK model with first and zero order absorption rates best described  
107 the OZ439 and DSM265 drug concentrations, respectively (*Materials and Methods* sec-  
108 tion). Table 2 summarises the estimated PK parameters for the data from the combina-  
109 tion therapy trial. Figure 1 shows the observed and simulated drug concentration profiles  
110 of the 13 volunteers; see Figure S1 of Supplementary Material for the PK profiles of the  
111 volunteers receiving OZ439 and DSM265 alone. The profiles show significantly higher  
112 concentration of DSM265 in the blood plasma of volunteers compared with OZ439.

## 113 **Pharmacodynamics**

114 The antimalarial activities of the drugs were modelled using the mathematical model de-  
115 fined in equation (1). The model accounts for differential action of the drugs on different  
116 stages of the parasite life cycle and PD interaction between the drugs. Initially, the PD  
117 model was fitted to the measured parasitaemia of volunteers in the OZ439 and DSM265  
118 mono-therapy trials (results shown in Section *Mono-therapies* in the Supplementary Ma-

119 terial). The estimated posterior distributions were then used to inform the estimation of  
120  $E_{max}$ ,  $\gamma$ ,  $EC_{50}$  and  $k_{e0}$  in the OZ439-DSM265 model fitted to the data of the combination  
121 therapy trial (see the *Materials and Methods* section).

122 Figure 2 shows the observed parasitaemia profiles for the 13 volunteers (black lines  
123 and dots), overlaid with the posterior predictive distributions (red line: median; shaded  
124 region: 95% credible interval). The results show that the PK-PD model captures the  
125 dynamics of the observed parasitaemia well for all individuals.

126 The estimated PD parameters for the combination therapy are summarised in Table  
127 3; Tables S1 and S2 of the Supplementary Material include the details of the posterior  
128 distributions of the PD parameters estimated from modelling of the mono-therapy trials  
129 data.  $\hat{R}$  and  $n_{eff}$  metrics (see Table S3 of the Supplementary Material) indicate the  
130 convergence of the Hamiltonian Monte Carlo (HMC) Markov chains:  $\hat{R}$  values are close  
131 to one, and  $n_{eff}$  values are large; see *Materials and Methods* section. Other model fit  
132 diagnostics for the four trials are illustrated in Section 4 of the Supplementary Material.

133 The results in Table 3 show that the posterior mean of the initial parasite load  
134 (sum of circulating and sequestered parasites) at the time of first parasitaemia mea-  
135 surement (on average 49.3 hours before administration of OZ439-DSM265),  $N_0$ , was  
136  $1.91 \times 10^6$  (95% Credible Interval (CrI):  $1.16 \times 10^6, 2.85 \times 10^6$ ). The estimated initial  
137 age-distribution indicate that the majority of the parasites at the time of the first mea-  
138 surement were at the ring blood stage of the parasite  $\sim 48$  h lifecycle (the posterior mean  
139 of  $\mu_0$  is 5.55 hours (95% CrI: 2.46, 9.5)) with a spread ( $\sigma_0$ ) of 10.13 hours (95% CrI:  
140 8.43, 11.72). The initial decline in parasitaemia of many of the volunteers confirms these

141 results, since ageing of the cluster of ring parasites (observed in the blood) into tropho-  
142 zoites/schizonts (not observed in the blood) would lead to a temporary decline in the  
143 observed parasitaemia.

144 Parasite multiplication factor (PMF; the number of newly infected red blood cells by  
145 merozoites released from a ruptured shizont) was estimated to be 10.56 (95% CrI: 6.92,  
146 17.6).  $E_{max}$  of DSM265 and OZ439 were estimated to be (0.63 (95% CrI: 0.53, 0.75)) and  
147 (0.35 (95% CrI: 0.34, 0.38)), respectively. Note that OZ439 is assumed to kill parasites  
148 at all stages [22] while DSM265 only kills trophozoites [16], and the stage-specific action  
149 of these drugs was incorporated into the PD model (see Section *Pharmacodynamics*).  
150 Therefore, the lower estimated value of  $E_{max}$  for OZ439 compared with DSM265 does  
151 not mean that it is less potent in reducing the parasitaemia. In fact, the average of  $E_{max}$   
152 over all the ages of the parasite's lifecycle is 0.18 which is higher than that of DSM265  
153 (0.14); the killing windows of DSM265 and OZ439 span 11 and 39 hours, respectively, of  
154 the 48 hours lifecycle, and the killing effect of OZ439 was halved for parasites aged 6–25  
155 and 37–44 hours (equations (5) and (6)).

156 The estimated  $EC_{50}$  of OZ439 (23.62 (95% CrI: 19.02, 27.01)) [ng/mL] was signifi-  
157 cantly lower than that of DSM265 (1354.4 (95% CrI: 1088.94, 1741.38)) [ng/mL]. The  
158 average area under the curve (AUC) above  $EC_{50}$  for OZ439 were 96.4 and 103 [ng day/mL]  
159 for subjects of Cohorts A and B (OZ439 dose: 200 mg), respectively, and for DSM265  
160 were 210.9 and 5.3 [ng day/mL] for Cohorts A (DSM265 dose: 100 mg) and B (DSM265  
161 dose: 50 mg), respectively. The posterior median of the rate of transition between the  
162 blood plasma compartment to the effect site (hypothesised) compartment,  $k_{e0}$ , was 0.07  
163 (95% CrI: 0.05, 0.11) [1/h] for OZ439. For DSM265, the posterior median of  $k_{e0}$  was 5.11



164 (95% CrI: 2.5, 7.84) [1/h]. However, the distributions of prior and posterior samples for  
165 this parameter were fairly similar (Figure S5 of Supplementary Material), implying that  
166 these data were not informative for estimating  $k_{e0}$  of DSM265.

167 The estimated values of the OZ439-DSM265 PD interaction parameter,  $\alpha$ , shows a  
168 trend toward antagonistic interaction (2.25 (95% CrI: 0.9, 4.06)). The General Pharma-  
169 codynamic Interaction (GPDI) model [23] similarly indicated a slight antagonistic inter-  
170 action ( $\alpha = 1.38$  (95% CrI: 0.95, 1.95)), when the drug-drug interaction was incorporated  
171 by altering  $E_{max}$  (equation (8a)); however, when drug-drug interaction was incorporated  
172 by varying  $EC_{50}$  (equation (8b)), the estimated interaction was not significantly different  
173 from zero-interaction, i.e.  $\alpha = 1.09$  (95% CrI: 0.69, 1.69).

## 174 Prediction of the optimal dosing regimen

175 To determine a dosing regimen that provides the WHO recommended 42-day cure rate  
176 of at least 90%, the model was simulated using the posterior samples of the individual  
177 parameters for different combinations of single doses of OZ439 and DSM265; see *Materials*  
178 *and Methods* section. For the parasitaemia at the time of treatment ( $t = 0$ ), the actual  
179 values observed in malaria-endemic regions were used: the recorded parasitaemias of  
180 1,241 patients (age range: 6 months–65 years) across 15 sites in 10 countries (Africa and  
181 South-East Asia) had a median of 52,250 (range: 2560–605,329) parasites/mL [3]. Note,  
182 only parasitaemia after drug administration is simulated, i.e. the parasitaemia growth  
183 phase was not simulated.

184 Figure 3 shows the mean 42-day cure rates over 20 datasets each comprised of 100

185 simulated hypothetical patients (2000 patients in total) who received different combina-  
186 tions of OZ439 and DSM265 doses; the patients whose parasitaemia got below the Lower  
187 Limit of Quantification (LLOQ: 10 [parasites/mL]) over 42 days of follow-up were con-  
188 sidered cured. The lower and upper limits of the 42-day cure rates are shown in Figure  
189 S6 of the Supplementary Material. The dose combinations that yielded 42-day cure rates  
190 above 90% are outlined with black. The selection of the simulated doses shown in the  
191 figure fall within current evidence for safe and tolerable dosing of both drugs. OZ439 is  
192 shown to be safe and well tolerated up to 1200 mg administered as a capsule and up to  
193 1600 mg when administered as an oral dispersion [17]. The safety profile of DSM265 is  
194 seemingly not as good as OZ439, as the number of adverse effects was higher in infected  
195 volunteers who received DSM265 compared to those who received placebo [15], although,  
196 the number of adverse events were not correlated with the administered dose.

197 The results in Figure 3 show that the 42-day 90% cure rate cannot be achieved for  
198 doses up to 200 mg of OZ439 and 100mg of DSM265. Various dose combinations achieve  
199 a  $\geq 90\%$  42-day cure rate, however, considering safety and tolerability of each drug, we  
200 recommend the combination of 800 mg of OZ439 and 450 mg of DSM265 be investigated  
201 in further trials. This dosing regimen also provides high drug concentrations of OZ439  
202 in the blood plasma, covering the exposure duration of DSM265 for up to 42 days.

203 The initial distribution of the age of parasites for each simulated patient was assumed  
204 to follow that estimated from the volunteers. A sensitivity analysis, where the mean of  
205 the initial parasite age distribution was assumed to follow a uniform distribution over  
206 (0, 48 h), was performed (see Figure S7 of the Supplementary Material). The results  
207 showed that predicted cure rates can vary slightly by changing the initial parasite age

208 distribution, however, for 800 mg of OZ439 and 450 mg of DSM265 the predicted 42-day  
209 cure rate remained above 90%, confirming the robustness of this dosing regimen.

## 210 Discussion

211 We proposed a within-host mathematical PK-PD model for the combined antimalarial  
212 activity of two novel drugs: OZ439 and DSM265. Our model incorporated the parasite  
213 age-specificity of killing action of the drugs, parasite sequestration and PD interaction be-  
214 tween the drugs. Using a Bayesian hierarchical framework, our model provided a good fit  
215 to parasitaemia data collected pre- and post-administration of OZ439 and DSM265 from  
216 healthy volunteers inoculated with *P. falciparum* malaria. Simulating parasitological  
217 outcomes using the estimated PD parameters determined the safe and tolerable dosing  
218 regimens of 800 mg for OZ439 and 450 mg for DSM265 can yield the WHO recommended  
219 42-day cure rates ( $\geq 90\%$ ).

220 Our model simulations put forward a set of potential OZ439-DSM265 dose combina-  
221 tions that are predicted to be efficacious and are within the safety and tolerability limits  
222 [15, 17]. Among these dose combinations, one must be selected for deployment that does  
223 not lead to development of parasite resistance to one of the drugs due to long durations of  
224 sub-therapeutic exposure. The significantly longer exposure time of DSM265 (see Figure  
225 1) reinforces the possibility of resistance development to this drug, if the parasites are  
226 not simultaneously exposed to another drug. In fact, a study by Llanos-Cuentas et al.  
227 2018 [24] found evidence of selection of resistance to DSM265 through a mutation in  
228 the DHODH enzyme target in Peruvian patients who were administered a single dose of

229 DSM265. Therefore, the selected dose of OZ439 must be sufficiently high such that it  
230 exposes the parasites for long enough timespans during which the parasites are exposed  
231 to DSM265 as well. As a result, the selection of higher doses of OZ439 must be favoured  
232 from the set of all efficacious, safe and tolerable doses (Figure 3), e.g. 600mg or 800mg  
233 of OZ439, combined with 400 mg or 450mg of DSM265.

234 We proposed a novel model of the combined action of the drugs based on the Bliss  
235 independence concept [25]. Fitting the model to the parasitological data showed that  
236 OZ439 and DSM265 have a slight antagonistic interaction, which was also confirmed using  
237 a GPDI model for drug interaction; however, the antagonistic interaction was not strong  
238 enough to significantly nullify their combined effect, and the combination compound was  
239 still able to produce cure rates above 90%. We showed that the predicted cure rates  
240 can be influenced by the assumption about the initial age distribution of the parasites  
241 – highlighting the significant influence that synchronicity of infection at admission can  
242 have on treatment’s efficacy and the importance of incorporating that into a mathematical  
243 model – however, the suggested dosing regimen (800mg of OZ439 combined with 450mg  
244 of DSM265) still provided a  $\geq 90\%$  cure rate.

245 The PK-PD model proposed in this work can be used to guide phase 2 and 3 clinical  
246 trials evaluating the efficacy of OZ439–DSM265 regimens, helping to reduce the financial  
247 and logistical costs of these trials. The model did not include the potential contribution  
248 of host immunity to parasite clearance [26] since it was validated on volunteers who had  
249 not been previously exposed to malaria infection. However, the influence of immunity on  
250 parasite clearance would augment drug effect therefore resulting in an overestimate of the  
251 minimal efficacious dose, and thereby result in a greater safety margin. The efficacy of the

252 suggested dosing regimen in reducing gametocytaemia, and thereby transmission, was not  
253 investigated in this work. This will be considered in future work based on a model we have  
254 developed for within-host transmission dynamics [27]. Further, a more mechanistic model  
255 of the combined action of the drugs that accommodates the underlying processes of drug  
256 interaction could be used [28]. However, to do so would require a greater understanding  
257 of the drug-drug interactions that is yet unavailable, requiring more sophisticated *in vitro*  
258 parasite susceptibility experiments, e.g. checkerboard assays, that focus particularly on  
259 the combined effect of the drugs.

260 *P. falciparum* parasites resistant to ACTs are rapidly spreading across South-East  
261 Asia, impeding the goal of WHO to achieve malaria elimination by 2030 in this region.  
262 The combination of OZ439 and DSM265, administered according to the suggested effi-  
263 cacious and well tolerated regimens, appears to be a promising alternative treatment to  
264 replace the failing ACTs.

## 265 **Materials and Methods**

### 266 **Data**

267 Data from four separate studies of volunteers inoculated with *P. falciparum* malaria  
268 were used for estimating the parameters in this work: (i) OZ439 mono-therapy (doses:  
269 100, 200 and 500 mg) [12]; DSM265 mono-therapy (doses: (ii) 150 mg [14] and (iii) 400 mg  
270 [15]);(iv) OZ439-DSM265 combination therapy (doses: 200 mg of OZ439 combined with  
271 50 and 100 mg of DSM265) [7]; details of these studies are summarised in Table 1. The

272 data from the mono-therapy studies were used for constructing the prior distributions of  
273 the PD parameters, as detailed in the *Model fitting and simulation* section.

274 In the studies of OZ439 mono-therapy and OZ439-DSM265 combination therapy, the  
275 volunteers were initially inoculated with  $\sim 1800$  *P. falciparum*-infected red blood cells  
276 and were admitted and confined for 48 hours before the compounds were administered,  
277 after their parasitaemia reached  $\geq 1000$  parasites/mL or clinical symptoms appeared  
278 (whichever occurred first). In the DSM265 mono-therapy where 150 mg dose was ad-  
279 ministered, the volunteers were inoculated with  $\sim 1800$  and the threshold for admission  
280 was considered to be 800 parasites/mL [15]. In the other DSM265 mono-therapy where  
281 400mg of DSM265 was administered, the volunteers were inoculated with  $\sim 2800$  viable  
282 *P. falciparum* parasites and were treated on day 7 [14]. A single dose of the compounds  
283 were administered in all of the studies. All the volunteers received rescue treatment  
284 on a certain day following the drug administration or after parasitaemia recrudescence;  
285 only the parasitaemia measurements before the rescue treatment was administered were  
286 included in the analyses.

## 287 **Mathematical model**

288 The within-host PD model fitted to the parasitaemia data was based on the models  
289 of [20, 21], which include the stage-specificity of drug action, shown in susceptibility  
290 experiments to significantly impact killing effect of antimalarial drugs [29, 30]. Interaction  
291 between the PD action of the drugs was also incorporated in the model to capture the  
292 combined effect of OZ439 and DSM265.

## 293 Pharmacokinetics

294 A two-compartment PK model with first-order absorption for OZ439 and zero-order ab-  
295 sorption for DSM265 best described the PK profiles of the volunteers. The pharmaco-  
296 netics of each drug were not altered when the drugs were given in combination [7]. A  
297 delayed effect of the plasma drug concentration of both OZ439 and DSM265 on parasite  
298 killing was incorporated in the model. This was modelled as a transition between two  
299 compartments with rate  $k_{e0}$ ; see Supplementary Material for further information about  
300 the PK models. The concentrations at effect site,  $C_e(t)$ , were substituted into the PD  
301 model to derive drug action, as detailed below.

## 302 Pharmacodynamics

303 The PD model in [6] was used for the time-evolution of the number of parasites in the  
304 body,  $N$ :

$$N(a, t) = \begin{cases} N(a-1, t-1) (1 - E(a-1, t-1)), & 1 < a \leq 48, \\ N(48, t-1) (1 - E(48, t-1)) \times \text{PMF}, & a = 1, \end{cases} \quad (1)$$

305 where  $a$  is the parasite age, taking only integer values over the range 1 to 48,  $t$  is time,  
306 taking only integer values, and PMF is the *parasite multiplication factor*, which represents  
307 the number of merozoites released into the blood by a shizont at the end of its lifecycle  
308 which successfully invade red blood cells.  $E(a, t)$  is the killing effect of the drug, taking  
309 values between 0 and 1, and dependent upon the age of parasites during  $[t, t+1)$ . The  
310 subjects were assumed to be infected with an initial parasite load of  $N_0 = \sum_{a=1}^{48} N(a, 0)$

311 which has a discretised normal distribution over age with the mean at  $\mu_0$  hours and  
312 standard deviation  $\sigma_0$  hours (both on the continuous scale) and  $N(1, 0) = \text{PMF} \times N(48, 0)$ .  
313 To determine  $N(a, 0)$  by discretising a continuous normal distribution,  $n(a) \sim \mathcal{N}(\mu_0, \sigma_0)$ ,  
314 the following formula was used

$$N(a, 0) = N_0 \frac{n(a)}{\sum_{a=1}^{48} n(a)} \quad 1 \leq a \leq 48. \quad (2)$$

315 The number of detectable parasites circulating in the blood,  $M(t)$ , is determined by

$$M(t) = \sum_{a=1}^{26} N(a, t), \quad (3)$$

316 where it is assumed that the infected red blood cells in circulation (the parasitaemia  
317 measured by blood samples) constitute mostly of ring stage parasites, because the older  
318 parasites sequester in blood capillaries and are not visible in the blood samples [31]. The  
319 number of parasites per mL of blood (the unit of parasitaemia in the data) was determined  
320 by dividing  $M(t)$  by each patient's blood volume in  $mL$ ; the patients were assumed to  
321 have  $70 \text{ mL/kg}$  blood, hence patient's blood volume was calculated as  $70 \text{ mL/kg} \times$   
322 patient's weight.

323 We assumed Michaelis-Menten kinetics for  $E$ :

$$E(a, t) = E_{max} \frac{C_e(t)^\gamma}{C_e(t)^\gamma + EC_{50}^\gamma} q(a), \quad (4)$$

324 where  $E_{max}$  is the maximum killing effect of DHA;  $C_e(t)$  is the drug concentration at  
325 the effect site at time  $t$ ;  $EC_{50}$  is the concentration at which 50% of the maximum killing



326 effect is obtained;  $\gamma$  is the sigmoidicity (also known as slope) of the concentration-effect  
327 curve. The stage specificity of the killing effect is applied using the  $q(a)$ . A description  
328 of all the PD parameters are provided in Table 4.

329 Previous *in vitro* experiments showed that OZ439 kills the parasites at all the stages of  
330 the blood lifecycle [13], and DSM265 only kills trophozoites [16]. It has also been shown  
331 that OZ439 has its maximum activity against trophozoites (reviewed in [22]). Therefore  
332 we considered the following step functions for the stage specificity of the killing action of  
333 the drugs:

$$q_D(a) = \begin{cases} 1, & a \in [26, 36], \\ 0, & \text{otherwise,} \end{cases} \quad (5)$$

334 and

$$q_O(a) = \begin{cases} 1, & a \in [26, 36], \\ 0.5, & a \in [6, 25] \cup [37, 44], \\ 0, & \text{otherwise,} \end{cases} \quad (6)$$

335 where  $q_D$  and  $q_O$  are the stage-specificity functions for DSM265 and OZ439, respectively.  
336 Note, early ring and late schizont parasites were considered insensitive to OZ439, similar  
337 to artemisinin [32].

### 338 Combined killing effect

339 An empirical approach was taken to model the combined effect of OZ439 and DSM265.  
340 Considering the unavailability of *in vitro* parasite susceptibility data, the number of  
341 interaction parameters were kept to a minimum. In addition, we selected a model where  
342 the combined effect monotonically increases with concentrations of OZ439 and DSM265,  
343 since, except in very rare cases, increasing the concentration of each drug must either  
344 increase the combined effect or the combined effect remains unchanged.

345 To characterise the interaction between OZ439 and DSM265 and model their combined  
346 action, a zero-interaction framework must first be defined. Two widely used empirical  
347 frameworks for zero-interaction are *Loewe additivity* [33] and *Bliss independence* [25];  
348 the former is used when the drugs are believed to have similar modes of action and the  
349 latter is when the drugs act through completely different mechanisms; see [6, 34] for  
350 further information. Different types of drug-drug interaction (synergism/antagonism)  
351 can then be modelled by characterising deviation from the zero-interaction model and  
352 the combined killing action can be defined accordingly.

353 OZ439 and DSM265 have different modes of action – the former kills the para-  
354 sites by activating the endoperoxide bond [12] and the latter by inhibiting the parasite’s  
355 DHODH enzyme [15] – hence Bliss independence was selected as the base model for  
356 zero-interaction. The Bliss independence model was then modified to define the combine  
357 effect,  $E_{OD}$ :

$$E_{OD} = (E_O^\alpha + E_D^\alpha - E_O^\alpha E_D^\alpha)^{\frac{1}{\alpha}}, \quad (7)$$

358 where  $E_O$  and  $E_D$  can be obtained using the Michaelis-Menten function (equation (4)),

359 and  $\alpha$  is the interaction parameter. The values of  $\alpha = 1$ ,  $\alpha > 1$  and  $0 < \alpha < 1$  correspond  
360 to zero-interaction, antagonism and synergism, respectively. The combined effect defined  
361 in this form is monotonically increasing and has a well-behaved form in regard to  $\alpha$ .  
362 Figure 4 depicts the combined effect for three different types of drug-drug interaction.

363 In addition to the previous approach for accommodating interaction (equation (7)), a  
364 simplified version of the GPDI model proposed by Wicha et al. [23] was examined. In their  
365 proposed model,  $EC_{50}$  and  $E_{max}$  are scaled depending on the concentration of the other  
366 drug and nature of the interaction (i.e. synergism/antagonism). However, the full form  
367 of their model was not used here due to potential non-identifiability of the parameters as  
368 well as non-monotonicity of the combined effects. To implement the simplified version of  
369 the GPDI model,  $E_{max}$  and  $EC_{50}$  are modulated as below

$$E_{max}(\alpha) = \frac{E_{max}}{\alpha}, \quad (8a)$$

370

$$EC_{50}(\alpha) = \alpha EC_{50}, \quad (8b)$$

371 where  $\alpha$  is the interaction parameter, and  $\alpha = 1$ ,  $\alpha > 1$  and  $0 < \alpha < 1$  correspond to  
372 zero-interaction, antagonism and synergism, respectively.  $E_{max}(\alpha)$  was bounded to be  
373  $\leq 1$  (see equation (1)).

### 374 Model fitting and simulation

375 A sequential approach was employed to fit the model to data: the PK parameters were  
376 first estimated to simulate drug concentration profiles which were then substituted into

377 the PD model to estimate the PD parameters. Fitting the PK models to the data  
378 was performed in a non-linear mixed effects modelling framework using Monolix [35] as  
379 follows. The individual PK parameters were estimated using the mode of the conditional  
380 distribution of the individual parameters. A total of 500 exploratory and 200 smoothing  
381 samples were generated using the Stochastic Approximation Expectation-Maximization  
382 (SAEM) method to estimate the population PK parameters. Finally, linearisation method  
383 was used to estimate the Fisher Information Matrix and the log-likelihood.

384 The PD model was fitted in a Bayesian hierarchical framework that allowed estimating  
385 individual parameters and incorporating the prior information about the parameters. The  
386 likelihood function was formed by assuming that the log-transformed parasitemia of the  
387 subjects have a normal distribution with mean at the simulated parasitaemia and a certain  
388 standard deviation. For parasitaemia below the quantification level, the M3 method  
389 was used, by considering the data below the quantification level left-censored and using  
390 the cumulative normal distribution in the likelihood function [36]; see Supplementary  
391 Material for further information.

392 The joint posterior distribution of the parameters was sampled using the Hamiltonian  
393 Monte Carlo (HMC) method [37]. Four chains were initialised randomly from different  
394 points to sample the posterior distribution. A total of 4,000 samples were generated by  
395 each chain, half of which were discarded as warm-up, leaving 8,000 samples in total from  
396 which to draw our inferences. The RStan package [38] in the R software [39] was used to  
397 implement the HMC method.

398 The individual parameters were logistic transformed from their original bounded do-

399 main to a new unbounded domain, using

$$\phi_i = \log \left( \frac{\theta_i - \mathbf{a}}{\mathbf{b} - \theta_i} \right), \quad (9)$$

400 where  $\theta_i$  represents an individual model parameter in the original domain, and  $\mathbf{a}$  and  
401  $\mathbf{b}$  are the lower and upper bounds of  $\theta_i$ . A multivariate normal distribution with mean  
402  $\phi$  and covariance matrix  $\Omega$  was considered for  $\phi_i$ . The generated posterior samples of  
403  $\phi_i$  were mapped back using the inverse function of equation (9) to get  $\theta_i$  over  $(\mathbf{a}, \mathbf{b})$ .  
404 The interaction parameter,  $\alpha$ , was log-transformed in order to generate the same propor-  
405 tion of prior samples of  $\alpha$  producing antagonistic and synergistic interactions, and then  
406 back-transformed to be used in equation (7); see the Supplementary Material for further  
407 information.

408 The values of  $a$  and  $b$  for the combination therapy and mono-therapies are listed in  
409 Tables 3 and 4, respectively. In fitting the model to data of mono-therapy trials, wide  
410 ranges that contain all feasible values for parameters were used. For fitting the model  
411 of combination therapy to the data, the results of the mono-therapy models were used  
412 to set the prior bounds of  $E_{max}$ ,  $\gamma$ ,  $EC_{50}$  and  $k_{e0}$ . To be specific, the 2.5% and 97.5%  
413 percentiles of the obtained posterior parameter samples in the mono-therapy models  
414 were used as  $a$  and  $b$ , respectively. This was considered assuming that the values of these  
415 parameters mostly depend on the activity of the individual drugs, hence their values in  
416 the combination therapy should be very close to those in the mono-therapies.

417 Convergence of the HMC chains were assessed by evaluating the following metrics: i)  
418 the potential scale reduction statistic,  $\hat{R}$ , which shows how well the chains are mixed –

419 satisfactory convergence of chains yields  $\hat{R} \approx 1$ ; ii) effective sample size,  $n_{eff}$ , is an esti-  
420 mate of the number of independent draws, after accounting for autocorrelation between  
421 the posterior samples.

422 Model simulations for predicting the cure rates were performed using the posterior  
423 samples of individual parameters. The cure rate was defined as the proportion of 1000  
424 patients whose parasitaemias were below the LLOQ (10 [parasites/mL]) within 42 days  
425 were considered cured. For the individual PD parameters, first, 20 samples of  $\phi$  and  
426  $\Omega$  were selected from the set of 8000 posterior samples – the last five posterior samples  
427 from each of the four HMC chains were used. Using the selected samples, 100 samples of  
428  $\phi_i$  were generated from a multivariate normal distribution with mean  $\phi$  and covariance  
429 matrix  $\Omega$ . The generated samples of  $\phi_i$  were then back-transformed using the inverse  
430 function of equation (9) to get the original PD parameter samples,  $\theta_i$ , which were used  
431 to simulate 20 cohorts/datasets each including 100 hypothetical patients. (see Section  
432 4 of Supplementary Material). Note, the total number of parasites was set to zero if it  
433 reached values below 1 in the simulations. For simulation of the PK profiles of OZ439  
434 and DSM265, samples were generated using the distributions, population parameters and  
435 between subject variabilities listed in Table 2.

436 The parasitaemias observed in the field were used as the baseline parasitaemia in  
437 the simulations; according to [3], the distribution of parasitaemias of 1,241 patients  
438 across 15 sites in 10 countries had median of 52,250 parasites/mL and spanned the  
439 range of 2560–605,329 parasites/mL. Thus, a log-normal distribution with the geomet-  
440 ric mean at 52,250 parasites/mL and standard deviation on the log-scale of  $0.78 =$   
441  $(\log(605329) - \log(2560)) / 7$  were used for generating samples of baseline parasitaemia in

442 the simulations. The total circulating parasitaemia,  $M(0)$ , was obtained by multiplying  
443 the generated samples from the log-normal distribution to average blood volume of the  
444 volunteers in the combination therapy trial, 5036.77 mL. To obtain the total parasite bur-  
445 den for an individual, i.e. sum of the sequestered and circulating parasites ( $N_0$ ), we used  
446 the posterior samples of  $\mu_0$  and  $\delta_0$  estimated for the volunteers as the mean and disperse  
447 of the initial age distributions. Finally, the age distribution and  $M(0)$  were substituted  
448 into equations (2) and (3) to obtain  $N_0$  for each simulated subject.

## 449 Acknowledgements

450 This work is supported in part by the Australian Centre for Research Excellence in  
451 Malaria Elimination, funded by the NHMRC (1134989). JAS is funded by an Australian  
452 National Health and Medical Research Council of Australia (NHMRC) Senior Research  
453 Fellowship (1104975). JSM is funded by a NHMRC Program Grant (1132975) and Prac-  
454 titioner Fellowship (1041802). The clinical trials (NCT02389348, NCT02573857, AC-  
455 TRN12613000522718, ACTRN12613000527763 and ACTRN12612000814875) from which  
456 the data were derived were supported by the Medicines for Malaria Venture (MMV) and  
457 funded by the Wellcome Trust (grant reference number: 095909/Z/11/Z), a grant by the  
458 Global Health Innovation and Technology Fund (GHIT) (grant no. G2014-108), and by  
459 funding from the Bill and Melinda Gates Foundation.

460 NG, MC and JJM are employed by MMV; none of the other authors declares any  
461 competing interests.

## 462      **References**

- 463      [1] WHO. *Guidelines for the treatment of malaria*. World Health Organization,  
464      third edition, 2015. ISBN 9241549122. URL [http://www.who.int/malaria/  
465      \[publications/atoz/9789241549127/en/\]\(http://www.who.int/malaria/publications/atoz/9789241549127/en/\).](http://www.who.int/malaria/publications/atoz/9789241549127/en/)
- 466      [2] Rob W van der Pluijm, Rupam Tripura, Richard M Hoglund, Aung Pyae Phyo, Dyso-  
467      ley Lek, Akhter ul Islam, Anupkumar R Anvikar, Parthasarathi Satpathi, Sanghami-  
468      tra Satpathi, Prativa Kumari Behera, Amar Tripura, Subrata Baidya, Marie Onyam-  
469      boko, Nguyen Hoang Chau, Yok Sovann, Seila Suon, Sokunthea Sreng, Sivanna  
470      Mao, Savuth Oun, Sovannary Yen, Chanaki Amaratunga, Kitipumi Chutasmit,  
471      Chalermpon Saelow, Ratchadaporn Runcharern, Weerayuth Kaewmok, Nhu Thi  
472      Hoa, Ngo Viet Thanh, Borimas Hanboonkunupakarn, James J Callery, Akshaya Ku-  
473      mar Mohanty, James Heaton, Myo Thant, Kripasindhu Gantait, Tarapada Ghosh,  
474      Roberto Amato, Richard D Pearson, Christopher G Jacob, Sónia Gonçalves, Mavuto  
475      Mukaka, Naomi Waithira, Charles J Woodrow, Martin P Grobusch, Michele van  
476      Vugt, Rick M Fairhurst, Phaik Yeong Cheah, Thomas J Peto, Lorenz von Seidlein,  
477      Mehul Dhorda, Richard J Maude, Markus Winterberg, Nguyen Thanh Thuy-Nhien,  
478      Dominic P Kwiatkowski, Mallika Imwong, Podjane Jittamala, Khin Lin, Tin Maung  
479      Hlaing, Kesinee Chotivanich, Rekol Huy, Caterina Fanello, Elizabeth Ashley, May-  
480      fong Mayxay, Paul N Newton, Tran Tinh Hien, Neena Valecha, Frank Smithuis,  
481      Sasithon Pukrittayakamee, Abul Faiz, Olivo Miotto, Joel Tarning, Nicholas P J  
482      Day, Nicholas J White, and Arjen M Dondorp. Triple artemisinin-based combi-  
483      nation therapies versus artemisinin-based combination therapies for uncomplicated  
484      *Plasmodium falciparum* malaria: a multicentre, open-label, randomised clinical trial.



485            *The Lancet*, 2020. ISSN 01406736. doi: 10.1016/s0140-6736(20)30552-3.

486            [3] Elizabeth A. Ashley, Mehul Dhorda, Rick M. Fairhurst, Chanaki Amaratunga,  
487            Parath Lim, Seila Suon, Sokunthea Sreng, Jennifer M. Anderson, Sivanna Mao,  
488            Baramey Sam, Chantha Sopha, Char Meng Chuor, Chea Nguon, Siv Sovannaroth,  
489            Sasithon Pukrittayakamee, Podjane Jittamala, Kesinee Chotivanich, Kitipumi  
490            Chutasmit, Chaiyaporn Suchatsoonthorn, Ratchadaporn Runcharoen, Tran Tinh  
491            Hien, Nguyen Thanh Thuy-Nhien, Ngo Viet Thanh, Nguyen Hoan Phu, Ye Htut,  
492            Kay-Thwe Han, Kyin Hla Aye, Olugbenga A. Mokuolu, Rasaq R. Olaosebikan,  
493            Olaleke O. Folaranmi, Mayfong Mayxay, Maniphone Khanthavong, Bouasy Hong-  
494            vanthong, Paul N. Newton, Marie A. Onyamboko, Caterina I. Fanello, Antoinette K.  
495            Tshefu, Neelima Mishra, Neena Valecha, Aung Pyae Phyo, François Nosten, Po-  
496            ravuth Yi, Rupam Tripura, Steffen Borrmann, Mahfudh Bashraheil, Judy Peshu,  
497            M. Abul Faiz, Aniruddha Ghose, M. Amir Hossain, Rasheda Samad, M. Ridwanur  
498            Rahman, M. Mahtabuddin Hasan, Akhterul Islam, Olivo Miotto, Roberto Amato,  
499            Bronwyn MacInnis, Jim Stalker, Dominic P. Kwiatkowski, Zbynek Bozdech, Attha-  
500            nee Jeeyapant, Phaik Yeong Cheah, Tharisara Sakulthaew, Jeremy Chalk, Benjamas  
501            Intharabut, Kamolrat Silamut, Sue J. Lee, Benchawan Vihokhern, Chanon Kuna-  
502            sol, Mallika Inwong, Joel Tarning, Walter J. Taylor, Shunmay Yeung, Charles J.  
503            Woodrow, Jennifer A. Flegg, Debashish Das, Jeffery Smith, Meera Venkatesan,  
504            Christopher V. Plowe, Kasia Stepniewska, Philippe J. Guerin, Arjen M. Dondorp,  
505            Nicholas P. Day, and Nicholas J. White. Spread of Artemisinin Resistance in *Plas-*  
506            *modium falciparum* Malaria. *New England Journal of Medicine*, 371(5):411–423,  
507            2014. ISSN 0028-4793. doi: 10.1056/NEJMoa1314981.

- 508 [4] Arjen M. Dondorp, François Nosten, Poravuth Yi, Debashish Das, Aung Phae Phyo,  
509 Joel Tarning, Khin Maung Lwin, Frederic Ariey, Warunee Hanpithakpong, Sue J.  
510 Lee, Pascal Ringwald, Kamolrat Silamut, Mallika Imwong, Kesinee Chotivanich,  
511 Pharath Lim, Trent Herdman, Sen Sam An, Shunmay Yeung, Pratap Singhasi-  
512 vanon, Nicholas P.J. Day, Niklas Lindegardh, Duong Socheat, and Nicholas J. White.  
513 Artemisinin Resistance in *Plasmodium falciparum* Malaria. *New England Journal of*  
514 *Medicine*, 361(5):455–467, 2009. ISSN 0028-4793. doi: 10.1056/NEJMoa0808859.
- 515 [5] Rick M Fairhurst and Arjen M Dondorp. Artemisinin-Resistant *Plasmodium fal-*  
516 *ciparum* Malaria. *Microbiology spectrum*, 4(3), 2016. ISSN 2165-0497. doi:  
517 10.1128/microbiolspec.EI10-0013-2016.
- 518 [6] Saber Dini, Sophie Zaloumis, Pengxing Cao, Ric N. Price, Freya J.I. Fowkes, Rob W.  
519 van der Pluijm, James M. McCaw, and Julie A. Simpson. Investigating the Efficacy  
520 of Triple Artemisinin-Based Combination Therapies for Treating *Plasmodium fal-*  
521 *ciparum* Malaria Patients Using Mathematical Modeling. *Antimicrobial agents and*  
522 *chemotherapy*, 62(11):e01068–18, 2018. ISSN 10986596. doi: 10.1128/AAC.01068-18.
- 523 [7] James S. McCarthy, Thomas Rückle, Suzanne L. Elliott, Emma Ballard,  
524 Katharine A. Collins, Louise Marquart, Paul Griffin, Stephan Chalon, and Jörg J.  
525 Möhrle. A Single-Dose Combination Study with the Experimental Antimalarials  
526 Artefenomel and DSM265 to Determine Safety and Antimalarial Activity against  
527 Blood-Stage *Plasmodium falciparum* in Healthy Volunteers. *Antimicrobial Agents*  
528 *and Chemotherapy*, 64(1):1–10, 2020. ISSN 10986596. doi: 10.1128/AAC.01371-19.
- 529 [8] Jeremy N. Burrows, Rob Hooft Van Huijsduijnen, Jörg J. Möhrle, Claude Oeuvray,

- 530 and Timothy Nc Wells. Designing the next generation of medicines for malaria  
531 control and eradication, 2013. ISSN 14752875.
- 532 [9] Nicholas J. White, Wirichada Pongtavornpinyo, Richard J. Maude, Sompob Sar-  
533 alamba, Ricardo Aguas, Kasia Stepniewska, Sue J. Lee, Arjen M. Dondorp, Lisa J.  
534 White, and Nicholas Pj Day. Hyperparasitaemia and low dosing are an important  
535 source of anti-malarial drug resistance. *Malaria Journal*, 8(1):1–18, 2009. ISSN  
536 14752875. doi: 10.1186/1475-2875-8-253.
- 537 [10] Susan A. Charman, Sarah Arbe-Barnes, Ian C. Bathurst, Reto Brund, Michael  
538 Campbell, William N. Charman, Francis C.K. Chiu, Jacques Chollet, J. Carl Craft,  
539 Darren J. Creek, Yuxiang Don, Hugues Matile, Melanie Maurer, Julia Morizzi,  
540 Tien Nguyen, Petros Papastogiannidis, Christian Scheurer, David M. Shackleford,  
541 Kamaraj Sriraghavan, Lukas Stingelin, Yuanqing Tang, Heinrich Urwyler, Xiao-  
542 fang Wang, Karen L. White, Sergio Wittlin, Lin Zhou, and Jonathan L. Venner-  
543 strom. Synthetic ozonide drug candidate OZ439 offers new hope for a single-dose  
544 cure of uncomplicated malaria. *Proceedings of the National Academy of Sciences*  
545 *of the United States of America*, 108(11):4400–4405, 2011. ISSN 00278424. doi:  
546 10.1073/pnas.1015762108.
- 547 [11] Toufigh Gordi, Xuan Huong Dinh, Ngoc Hai Trinh, Thi Nieu Nguyen, and Michael  
548 Ashton. Artemisinin pharmacokinetics and efficacy in uncomplicated-malaria pa-  
549 tients treated with two different dosage regimens. *Antimicrobial Agents and*  
550 *Chemotherapy*, 46(4):1026–1031, 2002. ISSN 00664804. doi: 10.1128/AAC.46.4.  
551 1026-1031.2002.

- 552 [12] James S. McCarthy, Mark Baker, Peter O'Rourke, Louise Marquart, Paul Griffin,  
553 Rob Hooft van Huijsduijnen, and Jörg J. Möhrle. Efficacy of OZ439 (artefenomel)  
554 against early *Plasmodium falciparum* blood-stage malaria infection in healthy volun-  
555 teers. *Journal of Antimicrobial Chemotherapy*, 71(9):2620–2627, 2016. ISSN 0305-  
556 7453. doi: 10.1093/jac/dkw174.
- 557 [13] Tuo Yang, Stanley C. Xie, Pengxing Cao, Carlo Giannangelo, James McCaw, Dar-  
558 ren J. Creek, Susan A. Charman, Nectarios Klonis, and Leann Tilley. Comparison  
559 of the exposure time dependence of the activities of synthetic ozonide antimalarials  
560 and dihydroartemisinin against K13 wild-type and mutant *Plasmodium falciparum*  
561 Strains. *Antimicrobial Agents and Chemotherapy*, 60(8):4501–4510, 2016. ISSN  
562 10986596. doi: 10.1128/AAC.00574-16.
- 563 [14] Katharine A. Collins, Thomas Rückle, Suzanne Elliott, Louise Marquart, Emma  
564 Ballard, Stephan Chalon, Paul Griffin, Jörg J. Möhrle, and James S. McCarthy.  
565 DSM265 at 400 Milligrams clears asexual stage parasites but not mature gameto-  
566 cytes from the blood of healthy subjects experimentally infected with *Plasmodium*  
567 *falciparum*. *Antimicrobial Agents and Chemotherapy*, 63(4), 2019. ISSN 10986596.  
568 doi: 10.1128/AAC.01837-18.
- 569 [15] James S McCarthy, Julie Lotharius, Thomas Rückle, Stephan Chalon, Margaret A  
570 Phillips, Suzanne Elliott, Silvana Sekuloski, Paul Griffin, Caroline L Ng, David A  
571 Fidock, Louise Marquart, Noelle S Williams, Nathalie Gobeau, Lidiya Bebrevska,  
572 Maria Rosario, Kennan Marsh, and Jörg J Möhrle. Safety, tolerability, pharma-  
573 cokinetics, and activity of the novel long-acting antimalarial DSM265: a two-part

- 574 first-in-human phase 1a/1b randomised study. *The Lancet. Infectious diseases*, 17  
575 (6):626–635, 2017. ISSN 1474-4457. doi: 10.1016/S1473-3099(17)30171-8.
- 576 [16] Margaret A. Phillips, Julie Lotharius, Kennan Marsh, John White, Anthony Dayan,  
577 Karen L. White, Jacqueline W. Njoroge, Farah El Mazouni, Yanbin Lao, Sreekanth  
578 Kokkonda, Diana R. Tomchick, Xiaoyi Deng, Trevor Laird, Sangeeta N. Bhatia,  
579 Sandra March, Caroline L. Ng, David A. Fidock, Sergio Wittlin, Maria Lafuente-  
580 Monasterio, Francisco Javier Gamo Benito, Laura Maria Sanz Alonso, Maria San-  
581 tos Martinez, Maria Belen Jimenez-Diaz, Santiago Ferrer Bazaga, Iñigo Angulo-  
582 Barturen, John N. Haselden, James Louttit, Yi Cui, Arun Sridhar, Anna Marie  
583 Zeeman, Clemens Kocken, Robert Sauerwein, Koen Dechering, Vicky M. Avery,  
584 Sandra Duffy, Michael Delves, Robert Sinden, Andrea Ruecker, Kristina S. Wick-  
585 ham, Rosemary Rochford, Janet Gahagen, Lalitha Iyer, Ed Riccio, Jon Mirsalis,  
586 Ian Bathurst, Thomas Rueckle, Xavier Ding, Brice Campo, Didier Leroy, M. John  
587 Rogers, Pradipsinh K. Rathod, Jeremy N. Burrows, and Susan A. Charman. A  
588 long-duration dihydroorotate dehydrogenase inhibitor (DSM265) for prevention and  
589 treatment of malaria. *Science Translational Medicine*, 7(296):296ra111–296ra111,  
590 2015. ISSN 19466242. doi: 10.1126/scitranslmed.aaa6645.
- 591 [17] Joerg J. Moehrle, Stephan Duparc, Christoph Siethoff, Paul L. M. van Giersber-  
592 gen, J. Carl Craft, Sarah Arbe-Barnes, Susan A. Charman, Maria Gutierrez, Sergio  
593 Wittlin, and Jonathan L. Vennerstrom. First-in-man safety and pharmacokinetics  
594 of synthetic ozonide OZ439 demonstrates an improved exposure profile relative to  
595 other peroxide antimalarials. *British Journal of Clinical Pharmacology*, 75(2):535–  
596 548, 2013. ISSN 03065251. doi: 10.1111/j.1365-2125.2012.04368.x.

- 597 [18] Eva Maria Hodel, Katherine Kay, and Ian M Hastings. Incorporating Stage-Specific  
598 Drug Action into Pharmacological Modeling of Antimalarial Drug Treatment. *Anti-*  
599 *timicrobial agents and chemotherapy*, 60(5):2747–56, 2016. ISSN 1098-6596. doi:  
600 10.1128/AAC.01172-15.
- 601 [19] M. B. Hoshen, K. Na-Bangchang, W. D. Stein, and H. Ginsburg. Mathematical  
602 modelling of the chemotherapy of *Plasmodium falciparum* malaria with artesunate:  
603 Postulation of 'dormancy', a partial cytostatic effect of the drug, and its implication  
604 for treatment regimens. *Parasitology*, 121(3):237–246, 2000. ISSN 00311820. doi:  
605 10.1017/S0031182099006332.
- 606 [20] Sompob Saralamba, Wirichada Pan-Ngum, Richard J. Maude, Sue J. Lee, Joel Tarn-  
607 ing, Niklas Lindegårdh, Kesinee Chotivanich, François Nosten, Nicholas P J Day,  
608 Duong Socheat, Nicholas J White, Arjen M Dondorp, and Lisa J White. Intrahost  
609 modeling of artemisinin resistance in *Plasmodium falciparum*. *Proceedings of the Na-*  
610 *tional Academy of Sciences of the United States of America*, 108(1):397–402, 2011.  
611 ISSN 1091-6490. doi: 10.1073/pnas.1006113108.
- 612 [21] Sophie Zaloumis, Andrew Humberstone, Susan A Charman, Ric N Price, Joerg  
613 Moehrle, Javier Gamó-Benito, James McCaw, Kris M Jansen, Katherine Smith,  
614 and Julie A Simpson. Assessing the utility of an anti-malarial pharmacokinetic-  
615 pharmacodynamic model for aiding drug clinical development. *Malaria Journal*, 11  
616 (1):303, 2012. ISSN 1475-2875. doi: 10.1186/1475-2875-11-303.
- 617 [22] Carlo Giannangelo, Freya J.I. Fowkes, Julie A. Simpson, Susan A. Charman, and  
618 Darren J. Creek. Ozonide Antimalarial Activity in the Context of Artemisinin-

- 619           Resistant Malaria. *Trends in Parasitology*, 35(7):529–543, 2019. ISSN 14715007.  
620           doi: 10.1016/j.pt.2019.05.002.
- 621   [23] Sebastian G. Wicha, Chunli Chen, Oskar Clewe, and Ulrika S.H. Simonsson. A  
622           general pharmacodynamic interaction model identifies perpetrators and victims in  
623           drug interactions. *Nature Communications*, 8(1):1–11, 2017. ISSN 20411723. doi:  
624           10.1038/s41467-017-01929-y.
- 625   [24] Alejandro Llanos-Cuentas, Martin Casapia, Raúl Chuquiyaauri, Juan Carlos Hino-  
626           josa, Nicola Kerr, Maria Rosario, Stephen Toovey, Robert H. Arch, Margaret A.  
627           Phillips, Felix D. Rozenberg, Jade Bath, Caroline L. Ng, Annie N. Cowell, Eliza-  
628           beth A. Winzeler, David A. Fidock, Mark Baker, Jörg J. Möhrle, Rob Hooft van Hui-  
629           jsduijnen, Nathalie Gobeau, Nada Araeipour, Nicole Andenmatten, Thomas Rückle,  
630           and Stephan Duparc. Antimalarial activity of single-dose DSM265, a novel plas-  
631           modium dihydroorotate dehydrogenase inhibitor, in patients with uncomplicated  
632           *Plasmodium falciparum* or *Plasmodium vivax* malaria infection: a proof-of-concept,  
633           open-label, phase 2a study. *The Lancet Infectious Diseases*, 18(8):874–883, 2018.  
634           ISSN 14744457. doi: 10.1016/S1473-3099(18)30309-8.
- 635   [25] C. I. Bliss. The toxicity of poisons applied jointly. *Annals of Applied Biology*, 26(3):  
636           585–615, 1939. ISSN 00034746. doi: 10.1111/j.1744-7348.1939.tb06990.x.
- 637   [26] J. Tumwiine, S. Luckhaus, J. Y.T. Mugisha, and L. S. Luboobi. An age-structured  
638           mathematical model for the within host dynamics of malaria and the immune sys-  
639           tem. *Journal of Mathematical Modelling and Algorithms*, 7(1):79–97, 2008. ISSN  
640           15701166. doi: 10.1007/s10852-007-9075-4.

- 641 [27] Pengxing Cao, Katharine A. Collins, Sophie Zaloumis, Thanaporn Wattanakul, Joel  
642 Tarning, Julie A. Simpson, James McCarthy, and James M. McCaw. Modeling the  
643 dynamics of *Plasmodium falciparum* gametocytes in humans during malaria infec-  
644 tion. *eLife*, 8, 2019. ISSN 2050084X. doi: 10.7554/eLife.49058.
- 645 [28] Daniël M. Jonker, Sandra A.G. Visser, Piet H. Van Der Graaf, Rob A. Voskuyl,  
646 and Meindert Danhof. Towards a mechanism-based analysis of pharmacodynamic  
647 drug-drug interactions in vivo. *Pharmacology and Therapeutics*, 106(1):1–18, 2005.  
648 ISSN 01637258. doi: 10.1016/j.pharmthera.2004.10.014.
- 649 [29] Con Dogovski, Stanley C. Xie, Gaetan Burgio, Jess Bridgford, Sachel Mok, James M.  
650 McCaw, Kesinee Chotivanich, Shannon Kenny, Nina Gnädig, Judith Straimer,  
651 Zbynek Bozdech, David A. Fidock, Julie A. Simpson, Arjen M. Dondorp, Simon  
652 Foote, Nectarios Klonis, and Leann Tilley. Targeting the cell stress response of  
653 *Plasmodium falciparum* to overcome artemisinin resistance. *PLOS Biology*, 13(4):  
654 e1002132, 2015. ISSN 1545-7885. doi: 10.1371/journal.pbio.1002132.
- 655 [30] Nectarios Klonis, Stanley C. Xie, James M. McCaw, Maria P. Crespo-Ortiz, So-  
656 phie G. Zaloumis, Julie A. Simpson, and Leann Tilley. Altered temporal response  
657 of malaria parasites determines differential sensitivity to artemisinin. *Proceedings of*  
658 *the National Academy of Sciences of the United States of America*, 110(13):5157–62,  
659 2013. ISSN 1091-6490. doi: 10.1073/pnas.1217452110.
- 660 [31] Rachanee Udomsangpetch, Busaba Pipitaporn, Kamolrat Silamut, Robert Pinches,  
661 Sue Kyes, Sornchai Looareesuwan, Christopher Newbold, and Nicholas J White.  
662 Febrile temperatures induce cytoadherence of ring-stage *Plasmodium falciparum*-



- 663 infected erythrocytes. *Proc Natl Acad Sci U S A*, 99(18):11825–11829, 2002. ISSN  
664 0027-8424. doi: 10.1073/pnas.172398999.
- 665 [32] F. ter Kuile, N. J. White, P. Holloway, G. Pasvol, and S. Krishna. *Plasmodium*  
666 *falciparum*: In vitro studies of the pharmacodynamic properties of drugs used for  
667 the treatment of severe malaria. *Experimental Parasitology*, 76(1):85–95, 1993. ISSN  
668 10902449. doi: 10.1006/expr.1993.1010.
- 669 [33] S. Loewe. Die quantitativen Probleme der Pharmakologie. *Ergebnisse der Physiolo-*  
670 *gie*, 27(1):47–187, 1928. ISSN 0303-4240. doi: 10.1007/BF02322290.
- 671 [34] W. R. Greco, G. Bravo, and J. C. Parsons. The search for synergy: a critical review  
672 from a response surface perspective. *Pharmacol Rev*, 47(2), 1995.
- 673 [35] Monolix version 2018R1. *Antony, France: Lixoft SAS*, 2018. URL [http://lixoft.](http://lixoft.com/products/monolix/)  
674 [com/products/monolix/](http://lixoft.com/products/monolix/).
- 675 [36] Martin Bergstrand and Mats O. Karlsson. Handling data below the limit of quantifi-  
676 cation in mixed effect models. *AAPS Journal*, 11(2):371–380, 2009. ISSN 15507416.  
677 doi: 10.1208/s12248-009-9112-5.
- 678 [37] Radford M. Neal. MCMC using hamiltonian dynamics. In Steve Brooks, Andrew  
679 Gelman, Galin Jones, and Xiao-Li Meng, editors, *Handbook of Markov Chain Monte*  
680 *Carlo*, chapter 5, pages 113–162. Chapman & Hall/CRC, 2011. ISBN 9781420079425.  
681 doi: 10.1201/b10905-6.
- 682 [38] Stan Development Team. RStan: the R interface to Stan, 2020. URL [http://](http://mc-stan.org/)  
683 [mc-stan.org/](http://mc-stan.org/). R package version 2.21.2.

- 684 [39] R Core Team. R: A Language and Environment for Statistical Computing, 2019.  
685 URL <https://www.r-project.org/>.
- 686 [40] Leesa F. Wockner, Isabell Hoffmann, Peter O'Rourke, James S. McCarthy, and  
687 Louise Marquart. Comparison of statistical models to estimate parasite growth rate  
688 in the induced blood stage malaria model. *Malaria Journal*, 16(1):352, 2017. ISSN  
689 1475-2875. doi: 10.1186/s12936-017-1999-1.

## 690 Tables

Table 1: Dosing regimens of OZ439 and DSM265 administered in four clinical trials of volunteers infected with *P. falciparum*.

| Treatment*                   | Cohort  | Dose [mg] | Drug administration time* [hours] | Parasitaemia [no. parasites/mL] at time 0 median (range) |                    |
|------------------------------|---------|-----------|-----------------------------------|----------------------------------------------------------|--------------------|
| OZ439 [12]                   | A (n=8) | 100       | 0                                 | 5487 (939–7517)                                          |                    |
|                              | B (n=8) | 200       | 0                                 | 5676 (407–24152)                                         |                    |
|                              | C (n=8) | 500       | 0                                 | 4475 (953–10315)                                         |                    |
| DSM265 <sup>†</sup> [14, 15] | A (n=7) | 150       | 0                                 | 8442 (1676–13286)                                        |                    |
|                              | B (n=7) | 400       | 0                                 | 8457 (1235–62044)                                        |                    |
| OZ439-DSM265 [7]             | A (n=8) | OZ439     | 200                               | 0                                                        | 1629 (289–7678)    |
|                              |         | DSM265    | 100                               | 2                                                        |                    |
|                              | B (n=5) | OZ439     | 200                               | 0                                                        | 12364 (3495–27312) |
|                              |         | DSM265    | 50                                | 2                                                        |                    |

\* See the *Data* section for further information about inoculation of the volunteers with *P. falciparum* and their treatment.

<sup>†</sup> Data from two separate trials (Cohorts A [15] and B [14]) for DSM265 were used.

Table 2: Parameter values of the PK models. A two compartment model with zero-order and first-order absorption were used for DSM265 and OZ439, respectively.

| Parameter     | Drug   | Estimate (RSE)  | BSV (RSE)       | Description                                                                    |
|---------------|--------|-----------------|-----------------|--------------------------------------------------------------------------------|
| $F$           | DSM265 | 1 (Fixed)       | 0.0897 (44.50%) | Relative bioavailability                                                       |
|               | OZ439  | 1 (Fixed)       | 0 (Fixed)       |                                                                                |
| $CL/F$        | DSM265 | 0.514 (3.20%)   | 0.232 (11%)     | Apparent clearance [L/hour]                                                    |
|               | OZ439  | 43.2 (9.60%)    | 0.261 (16.40%)  |                                                                                |
| $V_c/F$       | DSM265 | 12.4 (14%)      | 0.66 (17.20%)   | Apparent central volume [L]                                                    |
|               | OZ439  | 148 (12.50%)    | 0 (Fixed)       |                                                                                |
| $Q/F$         | DSM265 | 38.5 (8.24%)    | 0.25 (Fixed)    | Apparent intercompartmental clearance [L/hour]                                 |
|               | OZ439  | 11.1 (8.66%)    | 0 (Fixed)       |                                                                                |
| $V_p/F$       | DSM265 | 61.8 (4.29%)    | 0.25 (Fixed)    | Apparent peripheral volume [L]                                                 |
|               | OZ439  | 903 (12.20%)    | 0.276 (38.80%)  |                                                                                |
| $T_{k0}$      | DSM265 | 2.64 (5.86%)    | 0.413 (10.20%)  | Absorption time [hours]                                                        |
| $k_a$         | OZ439  | 0.198 (6.85%)   | 0.106 (58.60%)  | Absorption rate parameter [1/hour]                                             |
| $T_{lag}$     | DSM265 | 0 (Fixed)       | 0 (Fixed)       | Absorption lag time [hours]                                                    |
|               | OZ439  | 0.418 (2.92%)   | 0.107 (20.70%)  |                                                                                |
| $\beta_F$     | DSM265 | -0.114 (22.20%) | -               | Coefficient of dose on $F$<br>Reference dose: 400mg                            |
| $\beta_{V_p}$ | DSM265 | 1.61 (16.90%)   | -               | Coefficient of weight on $F$<br>Reference weight: 76.8kg                       |
| $\beta_{CL}$  | DSM265 | 0.649 (34.10%)  | -               | Coefficient of dose on $CL$<br>Reference dose: 500mg (DSM265)<br>400mg (OZ439) |
|               | OZ439  | -0.473 (18.20%) | -               |                                                                                |

BSV: between subject variability

RSE: relative standard error defined as (standard deviation/mean)  $\times$  100

Table 3: Estimated parameter values of the PD model fitted to the data of OZ439-DSM265 combination therapy.

| Parameter*        | Drug         | Prior bounds <sup>†</sup>              | Posterior median <sup>‡</sup><br>(95% credible interval)    | BSV <sup>§</sup><br>(95% credible interval) |
|-------------------|--------------|----------------------------------------|-------------------------------------------------------------|---------------------------------------------|
| $N_0$             |              | $(5.04 \times 10^4, 4.00 \times 10^6)$ | $1.91 \times 10^6$ ( $1.16 \times 10^6, 2.86 \times 10^6$ ) | 1.20 (0.41, 2.06)                           |
| $\mu_0$ [h]       |              | (1, 48)                                | 5.55 (2.46, 9.5)                                            | 0.44 (0.01, 1.11)                           |
| $\sigma_0$ [h]    |              | (4, 14)                                | 10.13 (8.43, 11.72)                                         | 0.44 (0.01, 1.03)                           |
| PMF [1/48h]       |              | (5, 50)                                | 10.56 (6.92, 17.6)                                          | 1.75 (0.94, 2.72)                           |
| $E_{max}$         | OZ439        | (0.33, 0.41)                           | 0.35 (0.34, 0.38)                                           | 1.08 (0.04, 2.38)                           |
|                   | DSM265       | (0.49, 0.8)                            | 0.63 (0.53, 0.75)                                           | 1.18 (0.05, 2.51)                           |
| $EC_{50}$ [ng/mL] | OZ439        | (16.25, 28.01)                         | 23.62 (19.02, 27.01)                                        | 1.07 (0.04, 2.30)                           |
|                   | DSM265       | (989.1, 2085.46)                       | 1354.4 (1088.94, 1741.38)                                   | 1.91 (0.69, 3.15)                           |
| $\gamma$          | OZ439        | (1.16, 2.84)                           | 1.32 (1.19, 1.62)                                           | 0.97 (0.03, 2.21)                           |
|                   | DSM265       | (1.67, 7.27)                           | 2.13 (1.77, 3)                                              | 1.35 (0.07, 2.70)                           |
| $k_{e0}$ [1/h]    | OZ439        | (0.05, 0.17)                           | 0.07 (0.05, 0.11)                                           | 1.13 (0.03, 2.52)                           |
|                   | DSM265       | (1.7, 8.73)                            | 5.11 (2.5, 7.84)                                            | 1.01 (0.03, 2.30)                           |
| $\alpha$          | OZ439-DSM265 | (0.2, 5)                               | 2.25 (0.9, 4.06)                                            | 1.54 (0.09, 2.78)                           |

\* Description of the parameters and details of the prior bounds are summarised in Table 4.

<sup>†</sup> Estimated posterior samples of mono-therapy models were used to set the prior boundaries of  $E_{max}$ ,  $EC_{50}$ ,  $\gamma$  and  $k_{e0}$ .

<sup>‡</sup> The median and 95% credible intervals are drawn from 8,000 posterior samples (after burn-in) generated by the HMC algorithm; Supplementary Material includes the convergence metrics of HMC chains.

<sup>§</sup> Between Subject Variability (BSV) is the standard deviation of individual PD parameters from the population mean PD parameters on the logistic transform scale (see *Model fitting and simulation* section).

Table 4: Description and selected prior bounds (mono-therapies) for each parameter of the PD model.

| Parameter  | Trial           | Prior bounds                                                                     | Description                                                                                                                                                                                                                                                                                       |
|------------|-----------------|----------------------------------------------------------------------------------|---------------------------------------------------------------------------------------------------------------------------------------------------------------------------------------------------------------------------------------------------------------------------------------------------|
| $N_0$      | OZ439<br>DSM265 | $(5.12 \times 10^4, 8.02 \times 10^6)$<br>$(5.18 \times 10^4, 1.42 \times 10^7)$ | initial number of parasites (circulating + sequestered)<br><i>lower bound</i> : LLOQ $\times$ mean blood volume of volunteers in the trial<br><i>upper bound</i> : $2 \times$ maximum observed parasitaemia at the first blood measurement $\times$ mean blood volume of volunteers in the trial* |
| $\mu_0$    | OZ439<br>DSM265 | (1, 48)                                                                          | mean of initial parasites age distribution [h]<br><i>bounds</i> : lowest and highest ages of parasites in a 48h lifecycle                                                                                                                                                                         |
| $\sigma_0$ | OZ439<br>DSM265 | (4, 14)                                                                          | standard deviation of initial age distribution [h]<br><i>bounds</i> : selected to produce a wide range of dispersion (narrow to dispersed) in initial age distribution                                                                                                                            |
| PMF        | OZ439<br>DSM265 | (5, 50)                                                                          | parasite multiplication factor [/48 h]<br><i>bounds</i> : according to [40]                                                                                                                                                                                                                       |
| $E_{max}$  | OZ439<br>DSM265 | (0.05, 1)                                                                        | maximum killing effect<br><i>bounds</i> : an arbitrarily wide range is selected                                                                                                                                                                                                                   |
| $EC_{50}$  | OZ439<br>DSM265 | (0.5, 50)<br>(500, 5000)                                                         | concentration producing $E_{max}/2$ effect [ng/mL]<br><i>bounds</i> : according to [12] and [16] for OZ439 and DSM265, respectively                                                                                                                                                               |
| $\gamma$   | OZ439<br>DSM265 | (1, 10)                                                                          | sigmoidicity of the concentration-effect curves<br><i>bounds</i> : selected to generate a wide range of sigmoidicities                                                                                                                                                                            |
| $k_{e0}$   | OZ439<br>DSM265 | (0.01, 10)                                                                       | rate of drug transition from blood [1/h] plasma compartment to the effect-site compartment<br><i>bounds</i> : arbitrarily large range was selected                                                                                                                                                |
| $\alpha$   | OZ439-DSM265    | (0.2, 5)                                                                         | interaction parameter<br><i>bounds</i> : the selected values produce a wide range of interactions, from strong antagonism to strong synergism                                                                                                                                                     |

\* see Section *Model fitting and simulation* for conversion of the observable circulating parasitaemia (no. parasites/mL) to the total parasite biomass (circulating + sequestered)

691 **Figures**

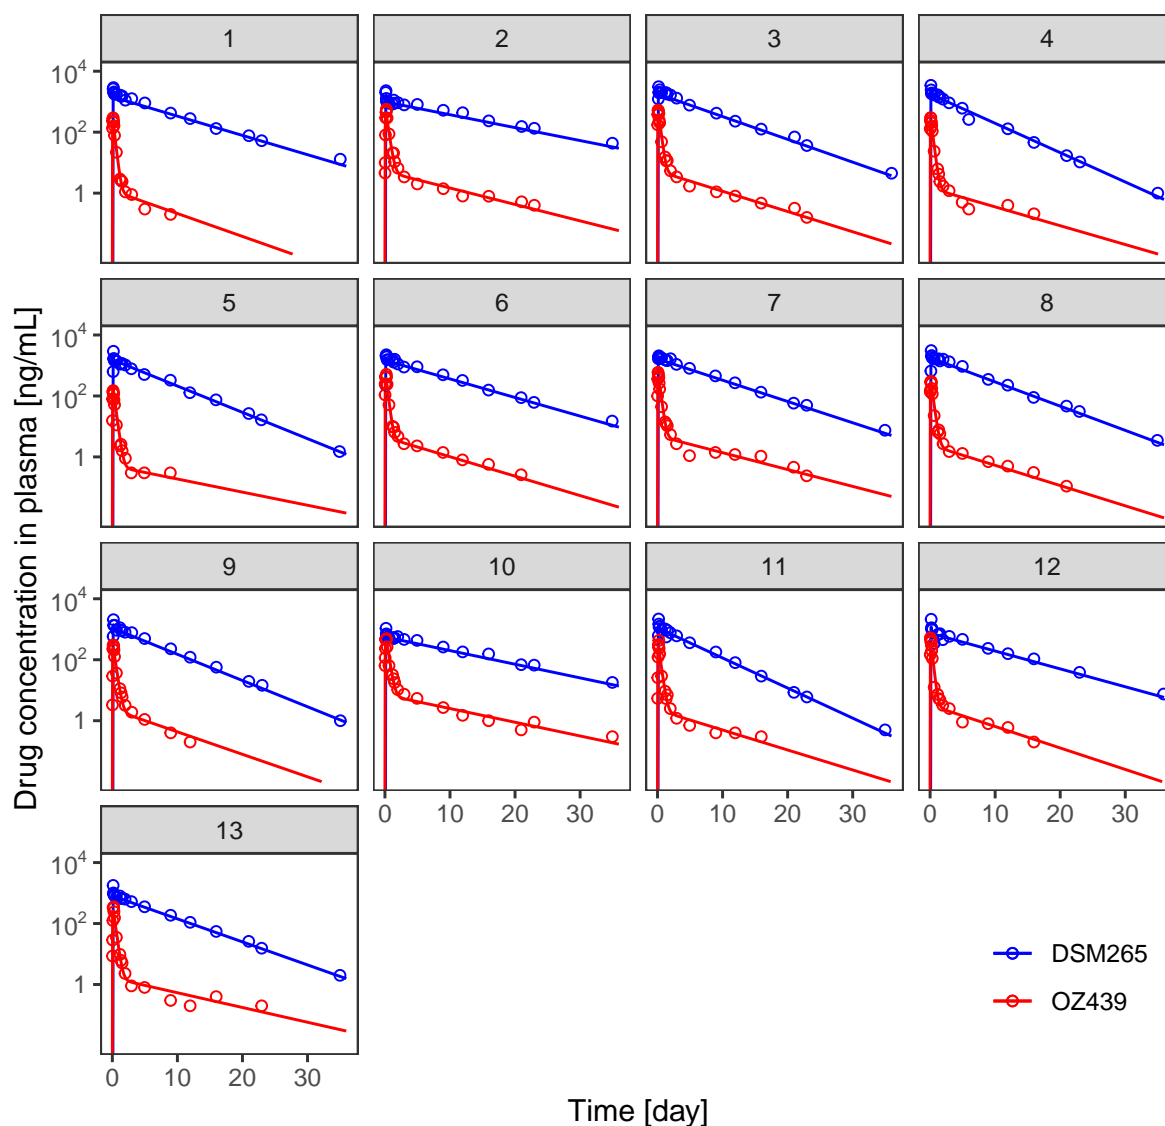

Figure 1: Pharmacokinetic profiles of OZ439 and DSM265 for the OZ439-DSM265 combination therapy. The points show the measured drug concentrations and the lines are the generated simulations using the mode of the conditional distribution of the individual PK parameters – the population parameters are listed in Table 2. A two-compartment model with first and zero order absorption rates were used for OZ439 and DSM265, respectively. Volunteers 1–8 received 200 mg of OZ439 and 100 mg of DSM265, and volunteers 9–13 received 200 mg of OZ439 and 50 mg of DSM265.

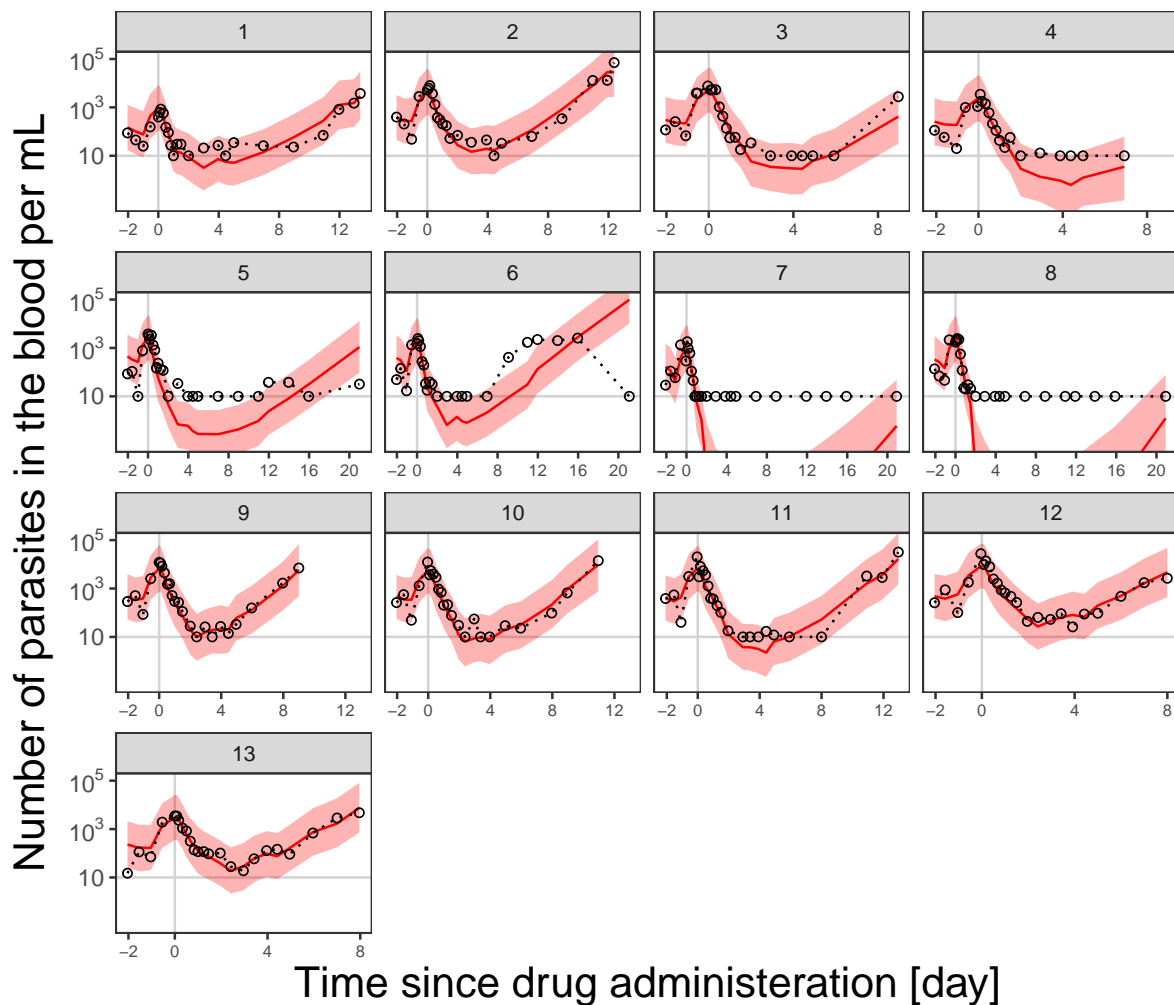

Figure 2: Posterior predictive check of the within-host PK-PD model fitted to the parasitaemia of volunteers in the combination therapy trial. The black circles are the observed parasitaemia; the red line and the shaded area denote the median and 95% credible interval (between 2.5<sup>th</sup> and 97.5<sup>th</sup> percentiles) of 8,000 simulations of the model using the posterior samples of the individual PD parameters (see *Materials and Methods* section). Volunteers 1 to 8 belong to Cohort A (OZ439: 200 mg; DSM265: 100 mg) and volunteers 9 to 13 to Cohort B (OZ439: 200 mg; DSM265: 50 mg); see Table 1 for details of the cohorts. The grey vertical line at time = 0 shows the administration time of OZ439; DSM265 was administered 2 hours after the OZ439 administration; see Table 1. The Lower Limit of Quantification (LLOQ), shown with the horizontal line, was 10 [parasites/mL].



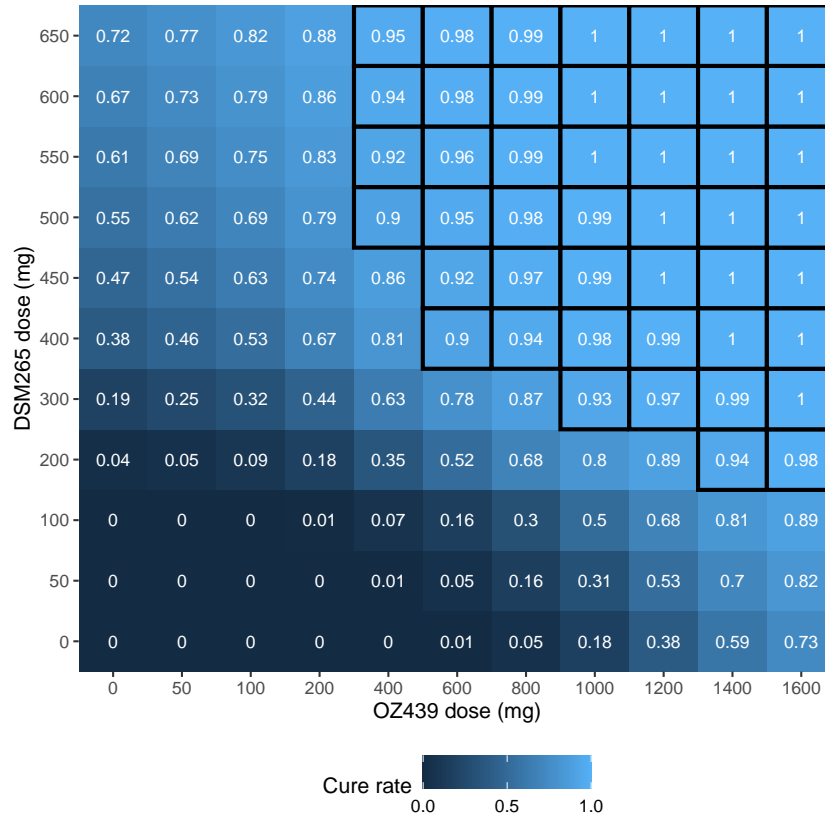

Figure 3: Expected cure rate within 42 days for different doses of OZ439 and DSM265 combination therapy. For each dose combination, simulations for 20 datasets each including 100 (new/hypothetical) patients were generated. The simulations were performed using the individual posterior predictive distributions of the PD parameters (see Table 3 and Section *Model fitting and simulation*) and the obtained 42-day cure rates averaged over the 20 datasets are shown in the grid squares (the lower and upper limits of the 42-day cure rates are shown in Figure S6 of the Supplementary Material). The values of parasitaemia at time of drug administration in the simulations were drawn from a log-normal distribution constructed using the reported values in malaria-endemic countries: median = 52,250 (range: 2560–605,329) parasites/mL [3]. Single doses of OZ3439 and DSM265 were administered at times 0 and 2 h, respectively. The dose combinations that yielded a 42-day cure rate  $\geq 90\%$  are outlined with black borders. Cure rate: proportion of patients in each dataset that had parasitaemia below the LLOQ (10 [parasites/mL]) over 42 days of follow-up.

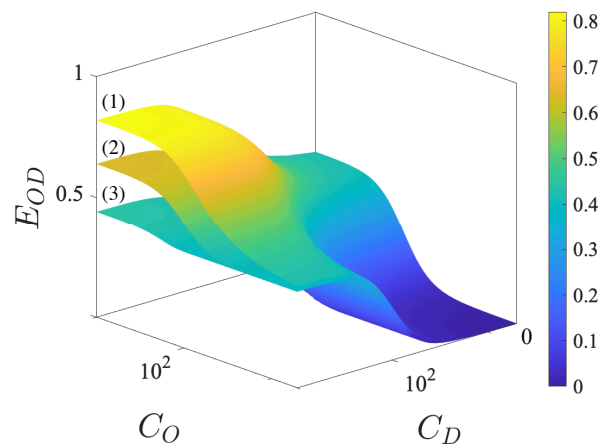

Figure 4: Combined effect of OZ439 and DSM265,  $E_{OD}$  in equation (7), for three different types of interaction and the following arbitrarily selected set of PD parameter values:  $E_{max,D} = E_{max,O} = 0.4$ ;  $\gamma_D = 3$ ;  $\gamma_O = 3$ ;  $EC_{50,D} = EC_{50,O} = 100$  [ng/mL], where  $O$  and  $D$  in the sub-indices denote correspondence to OZ439 and DSM265, respectively. The (1), (2) and (3) surfaces correspond to  $\alpha = 0.3$  (synergism),  $\alpha = 1$  (zero-interaction) and  $\alpha = 7$  (antagonism).
